# Supplementary material
Source: PubMed Central journal article supplement (PMC7193693)
Supplement: NIHMS1549535-supplement-Supplemental_Digital_Content.pdf [file NIHMS1549535-supplement-Supplemental_Digital_Content.pdf]

**Supplemental table 1.** Comparison of peripheral inflammatory mediator levels between PLWH and HIV-uninfected participants

| <b>Biomarkers</b>              | <b>PLWH (N=380)</b> | <b>HIV-uninfected participants (N=147)</b> | <b>P value</b>   |
|--------------------------------|---------------------|--------------------------------------------|------------------|
| <b>Th1 cytokines</b>           |                     |                                            |                  |
| <b>IL-2</b>                    | 3.94 (2.02-7.13)    | 2.98 (1.83-4.72)                           | <b>&lt;0.001</b> |
| <b>IL-12p70</b>                | 4.4 (2.2-7.7)       | 2.57 (1.43-4.46)                           | <b>&lt;0.001</b> |
| <b>IFN-<math>\gamma</math></b> | 4.39 (2.48-8.28)    | 3.46 (2.29-5.71)                           | <b>&lt;0.001</b> |
| <b>TNF-<math>\alpha</math></b> | 25.34 (15.12-38.19) | 19.52 (13.37-26.75)                        | <b>&lt;0.001</b> |
| <b>Th2 cytokines</b>           |                     |                                            |                  |
| <b>IL-4</b>                    | 1.14 (0.62-1.98)    | 0.6 (0.38-1.17)                            | <b>&lt;0.001</b> |
| <b>IL-5</b>                    | 7.13 (3.33-13.3)    | 4.59 (2.94-8.35)                           | <b>&lt;0.001</b> |
| <b>IL-6</b>                    | 0.51 (0.23-1.23)    | 0.13 (0.0-0.42)                            | <b>&lt;0.001</b> |
| <b>IL-10</b>                   | 2.7 (1.0-5.8)       | 1.98 (0.9-3.65)                            | 0.15             |
| <b>IL-13</b>                   | 1.01 (0.47-1.91)    | 0.53 (0.16-1.12)                           | <b>&lt;0.001</b> |
| <b>Th17 cytokines</b>          |                     |                                            |                  |
| <b>IL-17a</b>                  | 7.09 (3.74-12.50)   | 5.33 (3.33-8.74)                           | <b>&lt;0.001</b> |
| <b>Chemokines</b>              |                     |                                            |                  |
| <b>CCL2</b>                    | 18.62 (10.42-27.53) | 14.96 (9.86-20.82)                         | <b>0.011</b>     |
| <b>CCL4</b>                    | 7.74 (4.46-12.31)   | 7.25 (4.83-11.35)                          | 0.8              |
| <b>IL-8</b>                    | 9.1 (6.1-13.6)      | 6.9 (5.16-9.06)                            | <b>&lt;0.001</b> |
| <b>Others</b>                  |                     |                                            |                  |
| <b>IL-1<math>\beta</math></b>  | 0.40 (0.21-0.74)    | 0.24 (0.08-0.38)                           | <b>&lt;0.001</b> |
| <b>IL-7</b>                    |                     | 7.02 (5.46-9.81)                           | <b>0.033</b>     |
| <b>G-CSF</b>                   | 0.96 (0.22-2.08)    | 0 (0-15.58)                                | <b>&lt;0.001</b> |
| <b>GM-CSF</b>                  | 4.44 (2.48-8.28)    | 0.48 (0.06-1.19)                           | <b>&lt;0.001</b> |
| <b>CRP</b>                     | 1813 (737-3584)     | 1757 (744-3371)                            | 0.9              |
| <b>ET1</b>                     | 2.01 (1.59-2.61)    | 1.90 (1.41-2.40)                           | <b>0.014</b>     |

G-CSF: Granulocyte colony-stimulating factor; GM-CSF: Granulocyte-macrophage colony-stimulating factor; CRP: C-reactive protein; ET1: Endothelin 1

**Supplemental table 2.** Correlation of pulmonary function variables with peripheral inflammatory mediator levels in PLWH and HIV-uninfected participants

| Biomarkers                     | PLWH<br>(N=373)          |                          |                          | HIV-uninfected participants<br>(N=147) |                      |                      |
|--------------------------------|--------------------------|--------------------------|--------------------------|----------------------------------------|----------------------|----------------------|
|                                | Post FEV1<br>%           | Post FVC%                | DLco                     | Post FEV1<br>%                         | Post FVC%            | DLco                 |
| <b>Th1 cytokines</b>           |                          |                          |                          |                                        |                      |                      |
| <b>IL-2</b>                    | <b>-0.23 (&lt;0.001)</b> | <b>-0.26 (&lt;0.001)</b> | <b>-0.13 (0.011)</b>     | -0.08 (0.3)                            | -0.10 (0.2)          | -0.12 (0.15)         |
| <b>IL-12p70</b>                | <b>-0.18 (&lt;0.001)</b> | <b>-0.21 (&lt;0.001)</b> | -0.08 (0.14)             | -0.03 (0.7)                            | -0.06 (0.5)          | -0.04 (0.6)          |
| <b>IFN-<math>\gamma</math></b> | <b>-0.12 (0.026)</b>     | <b>-0.18 (&lt;0.001)</b> | -0.07 (0.2)              | -0.14 (0.09)                           | <b>-0.20 (0.018)</b> | <b>-0.20 (0.014)</b> |
| <b>TNF-<math>\alpha</math></b> | -0.07 (0.2)              | -0.09 (0.07)             | -0.08 (0.14)             | -0.13 (0.13)                           | -0.08 (0.3)          | 0.03 (0.7)           |
| <b>Th2 cytokines</b>           |                          |                          |                          |                                        |                      |                      |
| <b>IL-4</b>                    | <b>-0.16 (0.002)</b>     | <b>-0.21 (&lt;0.001)</b> | -0.08 (0.11)             | -0.13 (0.13)                           | <b>-0.18 (0.030)</b> | <b>-0.19 (0.023)</b> |
| <b>IL-5</b>                    | <b>-0.22 (&lt;0.001)</b> | <b>-0.27 (&lt;0.001)</b> | <b>-0.11 (0.034)</b>     | -0.08 (0.4)                            | -0.10 (0.2)          | -0.16 (0.06)         |
| <b>IL-6</b>                    | <b>-0.22 (&lt;0.001)</b> | <b>-0.23 (&lt;0.001)</b> | <b>-0.12 (0.018)</b>     | -0.07 (0.4)                            | -0.03 (0.7)          | 0.13 (0.12)          |
| <b>IL-10</b>                   | <b>-0.21 (&lt;0.001)</b> | <b>-0.25 (&lt;0.001)</b> | <b>-0.13 (0.009)</b>     | 0.00 (>0.9)                            | -0.01 (0.9)          | -0.05 (0.6)          |
| <b>IL-13</b>                   | <b>-0.16 (0.003)</b>     | <b>-0.18 (&lt;0.001)</b> | -0.06 (0.3)              | -0.02 (0.8)                            | -0.05 (0.6)          | -0.01 (0.9)          |
| <b>Th17 cytokines</b>          |                          |                          |                          |                                        |                      |                      |
| <b>IL-17a</b>                  | <b>-0.22 (&lt;0.001)</b> | <b>-0.26 (&lt;0.001)</b> | -0.05 (0.3)              | -0.13 (0.11)                           | -0.15 (0.06)         | <b>-0.19 (0.020)</b> |
| <b>Chemokines</b>              |                          |                          |                          |                                        |                      |                      |
| <b>CCL2</b>                    | -0.04 (0.4)              | -0.10 (0.06)             | 0.02 (0.8)               | -0.02 (0.8)                            | -0.05 (0.6)          | 0.06 (0.5)           |
| <b>CCL4</b>                    | 0.03 (0.6)               | -0.01 (0.8)              | -0.01 (0.9)              | 0.10 (0.2)                             | <b>0.17 (0.044)</b>  | <b>0.19 (0.018)</b>  |
| <b>IL-8</b>                    | <b>-0.13 (0.013)</b>     | <b>-0.13 (0.013)</b>     | <b>-0.18 (&lt;0.001)</b> | -0.10 (0.2)                            | -0.13 (0.11)         | -0.10 (0.2)          |
| <b>Others</b>                  |                          |                          |                          |                                        |                      |                      |
| <b>IL-1<math>\beta</math></b>  | -0.08 (0.12)             | -0.07 (0.21)             | -0.01 (0.8)              | -0.01 (0.9)                            | 0.00 (>0.9)          | 0.00 (>0.9)          |
| <b>IL-7</b>                    | <b>-0.19 (&lt;0.001)</b> | <b>-0.25 (&lt;0.001)</b> | <b>-0.11 (0.022)</b>     | -0.11 (0.18)                           | -0.14 (0.10)         | -0.14 (0.09)         |
| <b>G-CSF</b>                   | <b>-0.24 (&lt;0.001)</b> | <b>-0.29 (&lt;0.001)</b> | -0.09 (0.09)             | <b>-0.17 (0.041)</b>                   | <b>-0.19 (0.019)</b> | <b>-0.17 (0.042)</b> |
| <b>GM-CSF</b>                  | <b>-0.25 (&lt;0.001)</b> | <b>-0.31 (&lt;0.001)</b> | <b>-0.13 (0.009)</b>     | -0.10 (0.2)                            | -0.15 (0.06)         | <b>-0.22 (0.008)</b> |
| <b>CRP</b>                     | <b>-0.26 (&lt;0.001)</b> | <b>-0.27 (&lt;0.001)</b> | <b>-0.16 (0.002)</b>     | <b>-0.21 (0.012)</b>                   | <b>-0.23 (0.005)</b> | -0.03 (0.7)          |
| <b>ET1</b>                     | <b>-0.12 (0.019)</b>     | <b>-0.11 (0.035)</b>     | <b>-0.18 (&lt;0.001)</b> | -0.05 (0.6)                            | 0.05 (0.5)           | 0.03 (0.7)           |

G-CSF: Granulocyte colony-stimulating factor; GM-CSF: Granulocyte-macrophage colony-stimulating factor; CRP: C-reactive protein; ET1: Endothelin 1

**Supplemental table 3.** Partial correlation (P value) of pulmonary function variables with peripheral inflammatory mediator levels adjusted for pack-years in PLWH and HIV-uninfected participants

| Biomarkers                     | PLWH<br>(N=373)          |                          |                      | HIV-uninfected participants<br>(N=147) |                      |                      |
|--------------------------------|--------------------------|--------------------------|----------------------|----------------------------------------|----------------------|----------------------|
|                                | Post FEV1<br>%           | Post FVC%                | DLco                 | Post FEV1<br>%                         | Post FVC%            | DLco                 |
| <b>Th1 cytokines</b>           |                          |                          |                      |                                        |                      |                      |
| <b>IL-2</b>                    | <b>-0.20 (&lt;0.001)</b> | <b>-0.26 (&lt;0.001)</b> | -0.09 (0.07)         | -0.08 (0.3)                            | -0.10 (0.2)          | -0.12 (0.15)         |
| <b>IL-12p70</b>                | <b>-0.16 (0.002)</b>     | <b>-0.20 (&lt;0.001)</b> | -0.05 (0.3)          | -0.03 (0.7)                            | -0.06 (0.5)          | -0.04 (0.6)          |
| <b>IFN-<math>\gamma</math></b> | <b>-0.11 (0.027)</b>     | <b>-0.18 (&lt;0.001)</b> | -0.08 (0.13)         | -0.14 (0.09)                           | <b>-0.20 (0.018)</b> | <b>-0.20 (0.014)</b> |
| <b>TNF-<math>\alpha</math></b> | -0.05 (0.3)              | -0.09 (0.10)             | -0.06 (0.3)          | -0.13 (0.13)                           | -0.08 (0.3)          | 0.03 (0.7)           |
| <b>Th2 cytokines</b>           |                          |                          |                      |                                        |                      |                      |
| <b>IL-4</b>                    | <b>-0.16 (0.002)</b>     | <b>-0.21 (&lt;0.001)</b> | -0.08 (0.11)         | -0.13 (0.13)                           | <b>-0.18 (0.030)</b> | <b>-0.19 (0.023)</b> |
| <b>IL-5</b>                    | <b>-0.22 (&lt;0.001)</b> | <b>-0.27 (&lt;0.001)</b> | -0.09 (0.10)         | -0.08 (0.4)                            | -0.10 (0.2)          | -0.16 (0.06)         |
| <b>IL-6</b>                    | <b>-0.20 (&lt;0.001)</b> | <b>-0.22 (&lt;0.001)</b> | -0.08 (0.12)         | -0.07 (0.4)                            | -0.03 (0.7)          | 0.13 (0.12)          |
| <b>IL-10</b>                   | <b>-0.18 (&lt;0.001)</b> | <b>-0.24 (&lt;0.001)</b> | -0.10 (0.06)         | 0.00 (>0.9)                            | -0.01 (0.9)          | -0.05 (0.6)          |
| <b>IL-13</b>                   | <b>-0.14 (0.007)</b>     | <b>-0.17 (0.001)</b>     | -0.03 (0.5)          | -0.02 (0.8)                            | -0.05 (0.6)          | -0.01 (0.9)          |
| <b>Th17 cytokines</b>          |                          |                          |                      |                                        |                      |                      |
| <b>IL-17a</b>                  | <b>-0.21 (&lt;0.001)</b> | <b>-0.25 (&lt;0.001)</b> | -0.05 (0.3)          | -0.13 (0.11)                           | -0.15 (0.06)         | <b>-0.19 (0.020)</b> |
| <b>Chemokines</b>              |                          |                          |                      |                                        |                      |                      |
| <b>CCL2</b>                    | -0.04 (0.4)              | -0.10 (0.06)             | 0.01 (0.8)           | -0.02 (0.8)                            | -0.05 (0.6)          | 0.06 (0.5)           |
| <b>CCL4</b>                    | 0.01 (0.9)               | 0.00 (0.9)               | -0.04 (0.4)          | 0.10 (0.2)                             | <b>0.17 (0.044)</b>  | <b>0.19 (0.018)</b>  |
| <b>IL-8</b>                    | <b>-0.11 (0.028)</b>     | <b>-0.12 (0.019)</b>     | <b>-0.16 (0.002)</b> | -0.10 (0.2)                            | -0.13 (0.11)         | -0.10 (0.2)          |
| <b>Others</b>                  |                          |                          |                      |                                        |                      |                      |
| <b>IL-1<math>\beta</math></b>  | -0.07 (0.16)             | -0.06 (0.25)             | -0.01 (0.9)          | -0.01 (0.9)                            | 0.00 (>0.9)          | 0.00 (>0.9)          |
| <b>IL-7</b>                    | <b>-0.17 (0.001)</b>     | <b>-0.24 (&lt;0.001)</b> | -0.09 (0.09)         | -0.11 (0.18)                           | -0.14 (0.10)         | -0.14 (0.09)         |
| <b>G-CSF</b>                   | <b>-0.23 (&lt;0.001)</b> | <b>-0.28 (&lt;0.001)</b> | -0.09 (0.09)         | <b>-0.17 (0.041)</b>                   | <b>-0.19 (0.019)</b> | <b>-0.17 (0.042)</b> |
| <b>GM-CSF</b>                  | <b>-0.25 (&lt;0.001)</b> | <b>-0.30 (&lt;0.001)</b> | -0.07 (0.06)         | -0.10 (0.2)                            | -0.15 (0.06)         | <b>-0.22 (0.008)</b> |
| <b>CRP</b>                     | <b>-0.25 (&lt;0.001)</b> | <b>-0.26 (&lt;0.001)</b> | <b>-0.13 (0.009)</b> | <b>-0.21 (0.012)</b>                   | <b>-0.23 (0.005)</b> | -0.03 (0.7)          |
| <b>ET1</b>                     | <b>-0.09 (0.07)</b>      | -0.09 (0.07)             | <b>-0.13 (0.011)</b> | -0.05 (0.6)                            | 0.05 (0.5)           | 0.03 (0.7)           |

G-CSF: Granulocyte colony-stimulating factor; GM-CSF: Granulocyte-macrophage colony-stimulating factor; CRP: C-reactive protein; ET1: Endothelin 1. Using Bonferroni correction for multiple hypothesis testing (n = 3), P < 0.017 remains statistically significant.
